# Mathematical Modeling of Free Fatty Acid-Induced Non-Alcoholic Fatty Liver Disease (NAFLD)

Hermann-Georg Holzhütter<sup>1\*</sup> & Nikolaus Berndt<sup>2</sup>

<sup>1</sup> *Charité – Universitätsmedizin Berlin, corporate member of Freie Universität Berlin, Humboldt-Universität zu Berlin, and Berlin Institute of Health, Institute of Biochemistry, Charitéplatz 1, 10117, Berlin, Germany*

<sup>2</sup> *Charité – Universitätsmedizin Berlin, corporate member of Freie Universität Berlin, Humboldt-Universität zu Berlin, and Berlin Institute of Health, Institute for Imaging Science and Computational Modelling in Cardiovascular Medicine, Augustenburgerplatz 1, 13353, Berlin, Germany*

\*Corresponding Author:

Hermann-Georg Holzhütter

Charité – Universitätsmedizin Berlin

Institute of Biochemistry, Computational Systems Biochemistry Group

Chariteplatz 1, 10117 Berlin

Tel.: +49 30 450 528 166

Mail: [hergo@charite.de](mailto:hergo@charite.de)

Key Words: Mathematical Model; Non-alcoholic Liver Disease (NAFLD); Lipotoxicity; Tissue Damage; Liver Regeneration

## Summary

Non-Alcoholic Fatty Liver Disease (NAFLD) is the most common type of chronic liver disease in developed nations. Here, we present a generic model of free fatty acid (FFA)-induced NAFLD that constitutes the liver as ensemble of small liver units (LUs) differing in their vulnerability to toxic FFAs and capacities to metabolize FFAs and repair FFA-induced cell damage. The model describes NAFLD as cascading liver failure where failure of few LUs increases the risk for other LUs to fail as well. Model simulations provided the following insights: (1) Persistently high plasma levels of FFAs are sufficient to drive the liver through different stages of NAFLD; (2) Presence of NAFLD amplifies the deleterious impact of additional tissue-damaging hits; (3) Coexistence of non-steatotic and highly steatotic regions is indicative for the later occurrence of severe NAFLD stages.

## Introduction

Non-Alcoholic Fatty Liver Disease (NAFLD) is the most common type of chronic liver disease in developed nations, where it affects around 25% of the population [1]. NAFLD starts with simple steatosis and may progress to severe liver diseases like cirrhosis or hepatocellular carcinoma (HCC). Up to 30% of patients with liver steatosis develop a Non-Alcoholic Steatohepatitis (NASH), an inflammatory state of the liver that in about 20% of cases develops further to cirrhosis and end-stage liver failure [1]. Owing to the high metabolic reserve capacity of the liver, progression of NAFLD typically proceeds silently over long periods before an abrupt worsening of central metabolic liver functions results in severe clinical symptoms requiring urgent treatment.

Steatosis of the liver in the absence of significant alcohol intake is commonly a result of insulin resistance, the long-term consequence of hyper-caloric diet and a sedentary lifestyle. Insulin resistance of the adipose tissue increases the release of free fatty acids (FFAs) into the blood [2] and thus promotes the uptake of FFAs into liver, kidney, heart and other organs using FFAs as preferred energy-delivering substrates. FFAs exceeding the cellular need for ATP synthesis are esterified to triacylglycerol (TAG) and membrane lipids. Conversion of excess fatty acids into complex lipids serves as a detoxification mechanism as elevated levels of non-esterified fatty acids and some of their reaction products may cause cell damage [3]. FFAs exert hepatotoxicity through various molecular mechanisms including induction of an endoplasmic reticulum stress response, generation of free radicals and subsequently activation of the mitochondrial apoptosis pathway [4]. Necrosis and apoptosis of hepatocytes mount a dynamic multicellular response wherein stromal cells are activated *in situ* and/or recruited from the bloodstream, the extracellular matrix is remodeled, and epithelial cells expand to replenish their lost numbers. If the FFA challenge persists, a quasi-stationary balance between damage and tissue regeneration is established, which over the time may slowly shift towards fewer and fewer vital hepatocytes and more and more non-functional fibrotic lesions [5].

Several factors may explain why patients with diagnosed steatosis may or may not develop NASH and even more severe chronic liver disease. As with all diseases, genetic factors may determine the susceptibility of an organ to damaging events. Genome-wide association studies have revealed several single nucleotide polymorphisms associated with the pathology of NAFLD, among them the gene variant I148M of the enzyme Patatin-like phospholipase domain-containing 3 playing an important role in the cellular lipid and lipid droplet (LD) metabolism [6]. On top, the liver is continuously confronted with all kinds of orally administered toxins and gut-derived pathogens.

A now widely accepted hypothesis postulates that simple steatosis ('first hit') has to be followed by further pathophysiological hits, such as pathogen-associated acute inflammation or gut-derived endotoxins to push the liver successively into a critical state [7]. A third factor influencing the progression of NAFLD consists in the intra-hepatic spatial heterogeneity of metabolic and immune-modulatory capacities. Gradients along the porto-central axis of the liver lobule exist not only for genes and proteins of hepatocytes leading to zone dependent differences in lipid metabolism [8], but also in other types of liver cells and the matrix of the space of Disse [9, 10]. Zone-dependent differences in gene expression within a single lobule can be partially accounted for by concentrations gradients of metabolites, hormones and morphogens along the sinusoidal blood stream [11, 12]. In adults, steatosis is most intense around the central veins (predominantly in zones 2 and 3) whereas young children may have an alternate pattern of progressive NAFLD characterized by a zone 1 distribution of steatosis, inflammation and fibrosis [13].

Besides intra-lobular metabolic heterogeneity, independent experimental findings point to another layer of intra-hepatic heterogeneity that hitherto has not been implicated in NAFLD progression. This 'macro-scale' heterogeneity runs on lengths scales on millimeters and centimeters, which are orders of magnitude above the size of a single liver lobule. The existence of intra-hepatic regional differences of liver functions has been demonstrated by imaging data and histological findings. High-resolution imaging of hepatic blood flow revealed large regional variability up to a factor of three [14, 15]. Hepatic clearance of 2-[ $^{18}\text{F}$ ]fluoro-2-deoxy-D-galactose measured by PET/CT varied by about 24% in patients and 14% in healthy subject [16]. The spatial distribution of liver fat in adults with NAFLD showed a variability in the range of 0.7-4.5% [17]. Patient-specific spatial pattern of fat dispositions may largely vary from diffuse fat accumulation, diffuse fat accumulation with focal sparing, and focal fat accumulation [18]. Occurrence of 'macro-scale' heterogeneity in functional and metabolic parameters is also reflected by differences of NAFLD-associated histopathologic lesions between different anatomical parts of the liver [19].

Taken together, progression of NAFLD can be affected by several intrinsic and environmental factors, among which the rise of the serum FFA level, the distribution of intra-hepatic functional capacities, and the eventual occurrence of additional liver-damaging events play a central role. The question of how these factors may act together in the patient-specific development of NAFLD can hardly be addressed in a clinical approach for obvious technical and ethical reasons. Computer simulations based on physiologically reliable mathematical models may serve as an alternative in such situations. This prompted us to develop a generic and in many ways further expandable mathematical model of NAFLD progression.

## Mathematical Model

The mathematical model used for our disease simulations consists of three modules. The hemodynamic module describes the blood flow within the liver sinusoids [20]. The metabolic module describes the cellular turnover of FFAs and TAG, and the damage-repair module describes the FFA-induced damage of hepatocytes and tissue repair.

### Module 1: Kinetic model of FFA and TAG turnover in a liver unit

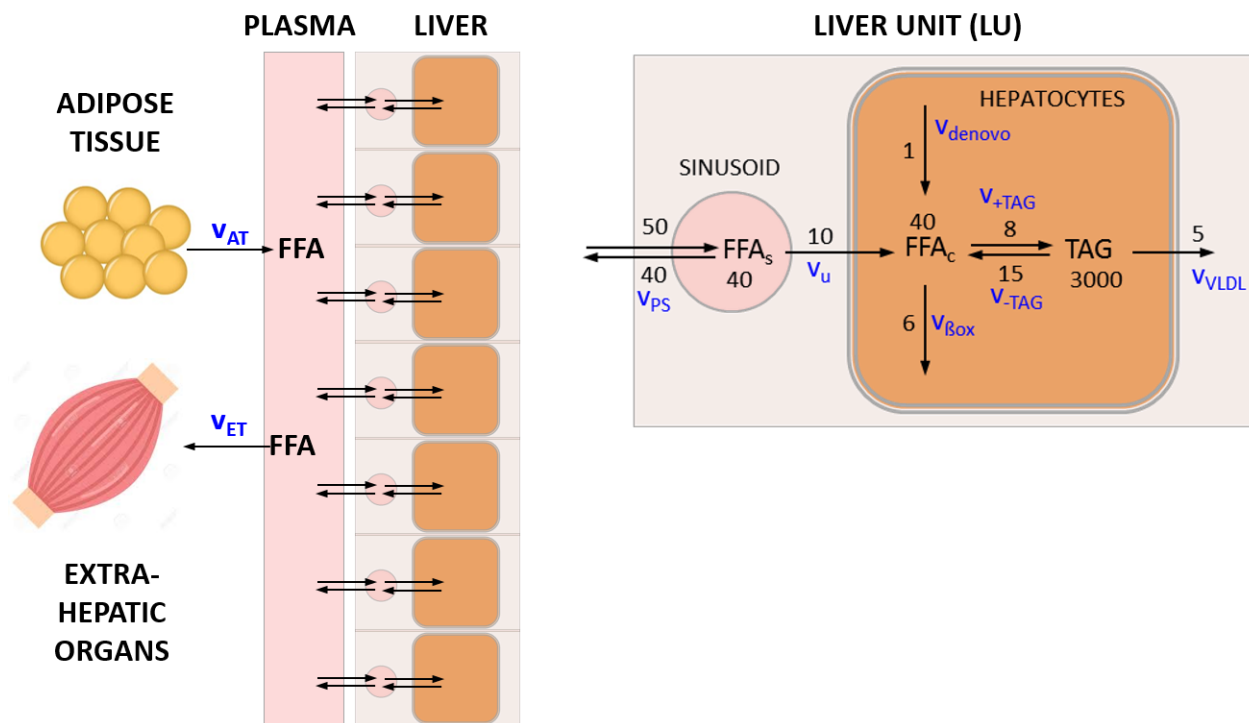

**Fig. 1** Transport and metabolism of free fatty acids (FFAs) in the liver

The liver is composed of a given number ( $N_U$ ) of liver units (LUs). Each LU comprises a vascular compartment and a cellular compartment. Plasma fatty acids (FFA<sub>p</sub>) result mainly from lipolysis in the adipose tissue (rate  $v_{AT}$ ). They can be utilized by various extra-hepatic organs, in particular skeletal muscle (rate  $v_{ET}$ ). FFAs enter the vascular bed of the liver with rate  $v_{ps}$  that is determined by the plasma concentration of fatty acids and the blood flow rate. A certain fraction of fatty acids is taken up by hepatocytes with a rate  $v_u$ , the remaining part re-enters the circulation via the venous blood efflux. Cellular fatty acids (FFA<sub>c</sub>) are either formed by *de novo* synthesis (rate  $v_{denovo}$ ) or taken up from the plasma. They can be used as building blocks for the synthesis of various lipids, mainly triacylglycerols (TAG) (rate  $v_{+TAG}$ ). Note that here TAG denotes the pool of FFAs esterified in TAG. Alternatively, FFA<sub>c</sub> can be degraded to acetyl-CoA, either by mitochondrial and peroxisomal  $\beta$ -oxidation or CYP-450-mediated  $\omega$ -oxidation (rate  $v_{\beta ox}$ ). TAG, the most abundant cellular lipid, is stored in lipid droplets (LDs), which can be hydrolyzed to FFA<sub>c</sub> if needed (rate  $v_{-TAG}$ ). A fraction of TAG is loaded in VLDL lipoproteins and exported (rate  $v_{VLDL}$ ). The numbers on the reaction arrows are FFA particle numbers (in micromoles) and particle transport rates (in micromoles/100 ml/min) for a healthy LU with a volume of 100 ml. The corresponding mass transport rates are given in Table 1.

We subdivided the liver into a larger number of small liver units (LUs) differing in their hemodynamic properties, metabolic capacities, vulnerability against FFA-induced cell damage and wound-healing capacities. A single LU is described by a two-compartment model: The vascular compartment formed by

the sinusoids receives fatty acids with the blood from the hepatic arteries and exchanges fatty acids with the cellular compartment, which is equipped with the average metabolic capacities of all hepatocytes in the unit (see Fig. 1).

**Table 1** Rate laws for the flux rates in Fig. 1 and standard values of the metabolic parameters

Rate constants were based on the particle numbers and particle transport rates shown in Fig. 1.

\*) calculated from the published VLDL-TAG secretion rate by assuming a liver volume of 1350 ml.

| Flux         | Rate law                                                              | Model value | Experimental value<br>( $\mu\text{mol}/\text{min}/100 \text{ ml}$ ) | Rate constant<br>( $\text{min}^{-1}$ ) |
|--------------|-----------------------------------------------------------------------|-------------|---------------------------------------------------------------------|----------------------------------------|
| $v_u$        | $v_u^i = k_u \cdot (fa_{s^i} - fa_i)$                                 | 7           | 10 [21]<br>0-40 [22]                                                | $k_u = 0.78$                           |
| $v_{denovo}$ | $v_{denovo} = k_{denovo}$                                             | 1           | 3%-18% $v_u$ [23]                                                   | $k_{denovo} = 0.012$                   |
| $v_{\beta}$  | $v_{\beta} = k_{\beta} \cdot fa_{c^i}$                                | 4.5         | 5 [24]                                                              | $k_{\beta} = 0.6$                      |
| $v_{+tag}$   | $v_{+tag} = k_{+tag} \cdot \left(\frac{fa_{c^i}}{fa_{crit}}\right)^2$ | 14          | 2-6 [25]<br>0-20 [26].                                              | $k_{+tag} = 3.6$                       |
| $v_{-tag}$   | $v_{-tag} = k_{-tag} \cdot tag^i$                                     | 11          |                                                                     | $k_{-tag} = 0.006$                     |
| $v_{VLDL}$   | $v_{VLDL} = k_{VLDL} \cdot tag^i$                                     | 3.5         | 4.5 *) [27]<br>1.5-10[28]                                           | $k_{VLDL} = 0.018$                     |

The kinetics of FFAs in the plasma and in the LUs is governed by the following system of first-order differential equations:

$$\frac{dfa_{s^i}}{dt} = fa_p \cdot v_{ps^i} - v_{s^i p} - \eta^i \cdot v_{uptake}^{s^i} \cdot \frac{\Omega_{cell}}{\Omega_{s^i}}$$

$$\frac{dfa_p}{dt} = \sum_i fa_{s^i} \cdot v_{s^i p} \cdot \frac{\Omega_{scale}}{\Omega_{bv}} - \sum_i fa_p \cdot v_{ps^i} \cdot \frac{\Omega_{scale}}{\Omega_{bv}} + v_{at}^{fa} - v_{et}^{fa}$$

$$\frac{dfa_i}{dt} = \eta^i \cdot v_{uptake}^{s^i} - \eta^i \cdot v_{tag_{syn}}^i + \eta^i \cdot v_{tag_{deg}}^i - \eta^i \cdot v_{\beta}^i + \eta^i \cdot v_{denovo}^i \quad (1)$$

$$\frac{dtag^i}{dt} = \eta^i \cdot v_{tag_{syn}}^i - \eta^i \cdot v_{tag_{deg}}^i - \eta^i \cdot v_{VLDL}^i$$

$$v_{at}^{fa} = \frac{v_{at}^{max} + v_{at}^{min}}{2} + \frac{v_{at}^{max} - v_{at}^{min}}{2} \cos\left(\frac{2\pi}{T}t\right)$$

$$v_{et}^{fa} = k_{et} \cdot fa_p$$

Blood flow is given by:

$$v_{ps^i} = \frac{\pi \cdot r_{s^i}^4}{8 \cdot vis_{blood} \cdot l_{s^i} \cdot \Omega_{s^i}} \cdot \Delta p_{p_{up}-s^i} \quad (2)$$

$$v_{s^i p} = \frac{\pi \cdot r_{s^i}^4}{8 \cdot vis_{blood} \cdot l_{s^i} \cdot \Omega_{s^i}} \cdot \Delta p_{s^i-p_{down}}$$

The upper index (i) numbers the LUs ( $i = 1, \dots, N_u$ ).  $r_{s^i}$ ,  $l_{s^i}$ ,  $\Omega_{s^i}$  denote the radius, length and volume of the i-th LU,  $vis_{blood}$  is the blood viscosity,  $\Delta p_{p_{up}-s^i}$  is the pressure gradient between arterial blood and the i-th LU and  $\Delta p_{s^i-p_{down}}$  denotes the pressure gradient between venous blood and the i-th LU. For details, see Berndt et al., 2018 [20]. The parameter  $\eta$  denotes the fraction of metabolically intact hepatocytes in the LU. The quadratic term on the right-hand side of the kinetic equations for TAG synthesis takes into account that with increasing cellular content of FFAs, the synthesis of TAG and storage in LDs proceeds super-linear due to the upregulation of lipogenic enzymes and proteins [29].  $fa_{crit}$  denotes the critical cellular concentration of fatty acids, at which the rate of TAG synthesis starts to rise in a non-linear fashion. Note that the time-dependent variation of plasma FFAs ( $fa_p$ ) depends on the contribution of all LUs to the elimination of FFAs from the plasma.

Fig. 2 illustrates how differences in the metabolic capacities of individual LUs may influence the diurnal level of cellular FFAs. The rate of fatty acid influx into the plasma was modeled by a periodic function with period T, reflecting the insulin-dependent variation of FFA release from the adipose tissue to the plasma.

The span of variations of the lipid species decreased in the order  $FA_p \rightarrow FA_s \rightarrow FA_c \rightarrow TAG$ . Figs. 3B,C illustrate how daily concentration changes of cellular FFAs in a LU depend on the TAG-synthesizing capacity. The larger the cellular capacity to convert FFAs into TAG, the lower the diurnal variations and the 24h mean of the cellular FFA concentration, but the higher the variations and mean of the TAG content. Figs. 3D,E illustrate the effect of random variations of metabolic parameters on the cellular profile of FFAs and TAG. 20% of random variations of the reference parameters (given in Table 1) may give rise to

concentration maxima of cellular FFAs between 0.08 mM and 0.68 mM. The TAG levels show an even larger variability.

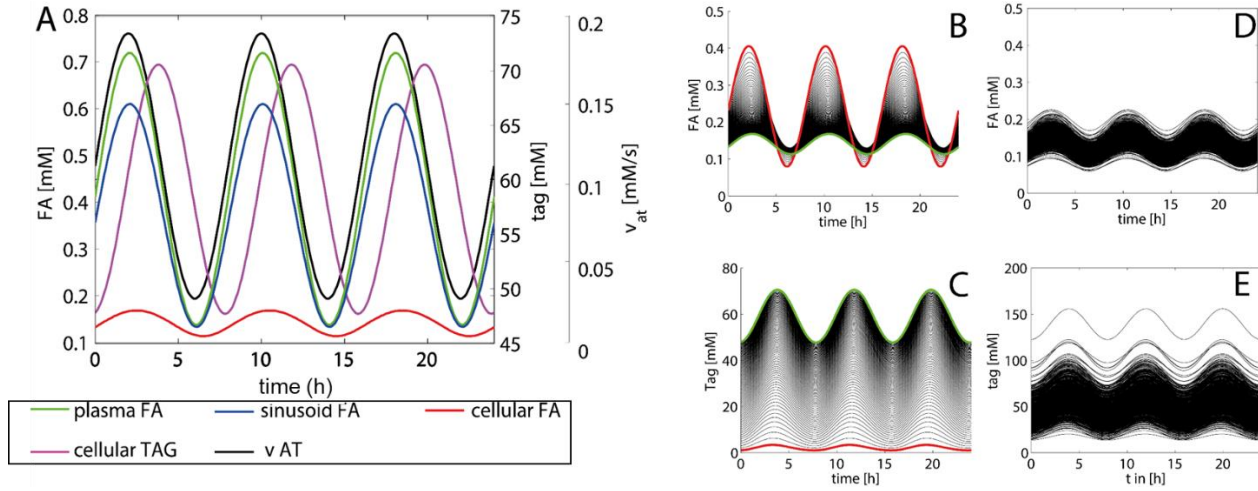

**Fig. 2** Diurnal variations of the concentration levels of FFAs and TAG

In this example, the release of FFA to the plasma varies three times per day between 1.8 mM/min and 11.4 mM/min.

A) Time-course of FFAs and TAG in a standard LU (endowed with kinetic parameters given in Table 1)

B,C) Impact of the cellular TAG storage capacity on variations of cellular TAG and FFAs. The curves were generated by varying the rate constant  $k_{+TAG}$  for TAG synthesis in small steps between 0 and 3.6 min<sup>-1</sup>. The values of all other model parameters were the same as given in Table 1. Red curves:  $k_{+TAG} = 0$  (no TAG synthesis). Green curves:  $k_{+TAG} = 3.6$  min<sup>-1</sup>

C,D) Time-course of FFAs and TAG at randomly varied kinetic parameters. 100 curves were generated with random, normally distributed parameter values having as sample mean the original values in Table 1 and possessing a standard deviation of 20% (= 0.2 mean value).

### Module 2: Fatty-acid induced cell damage and tissue repair

Numerous studies have provided evidence that elevated levels of fatty acids and of lipid species derived from fatty acids may cause cell damage resulting ultimately in cell loss by necrosis or apoptosis [30, 31]. Enhanced damage and loss of cells elicits a regenerative response, which in the liver includes mitotic division of hepatocytes and in case of severe damage also the differentiation of hepatic stem cells. In the model, time-dependent changes of functionally intact cells in the LU was described by the following equation:

$$\frac{d\eta^i}{dt} = v_r^i - v_d^i$$

$$v_r^i = \eta^2 \cdot (1 - \eta) \tag{3}$$

$$v_d^i = \begin{cases} k_d^i f a_{s,i} \leq f a_{crit} \\ k_d^i + \beta \cdot \left( \frac{f a_{s,i}}{f a_{crit}} - 1 \right) f a_{s,i} > f a_{crit} \end{cases}$$



Here,  $\eta$  is the fraction of functionally intact hepatocytes,  $v_r$  and  $v_d$  denote the rates of cell regeneration and cell loss.  $v_r$  was chosen to capture two opposing effects: The factor  $(1 - \eta)$  takes into account that the regenerative response elicited by immune cells rises with increasing cell damage, the factor  $\eta^2$  takes into account that tissue regeneration requires interacting cells. The combination of the two effects entails that the rate of tissue regeneration  $v_r$  is a non-monotone function with respect to  $\eta$  (represented by the green curve in Fig. 3A). The rate  $v_d$  of cell damage follows a first-order kinetics given by the cellular damage rate FD times  $\eta$ . FD is the sum of a basal rate  $k_d$  accounting for the continuous but small cell loss in the healthy liver, and a FFA-dependent additional term. The parameter  $\beta$  determines the increase of  $v_d$  if  $f a_{s,i}$  exceeds the threshold  $f a_{crit}$ .

The numerical values of  $f a_{crit}$  and of the kinetic parameters  $k_d$ ,  $k_r$  and  $\beta$  (see legend of Fig. 3) were chosen such that for the healthy liver, the life-span of hepatocytes amounted to 365 days (1 year), whereas for the cirrhotic liver and a fatty acid concentration that is twice as high as the critical concentration  $f a_{crit}$ , i.e.  $FFA_c = 2 \cdot f a_{crit}$ , the life span is shortened to 26 days according to findings in Macdonald, 1961 [32].

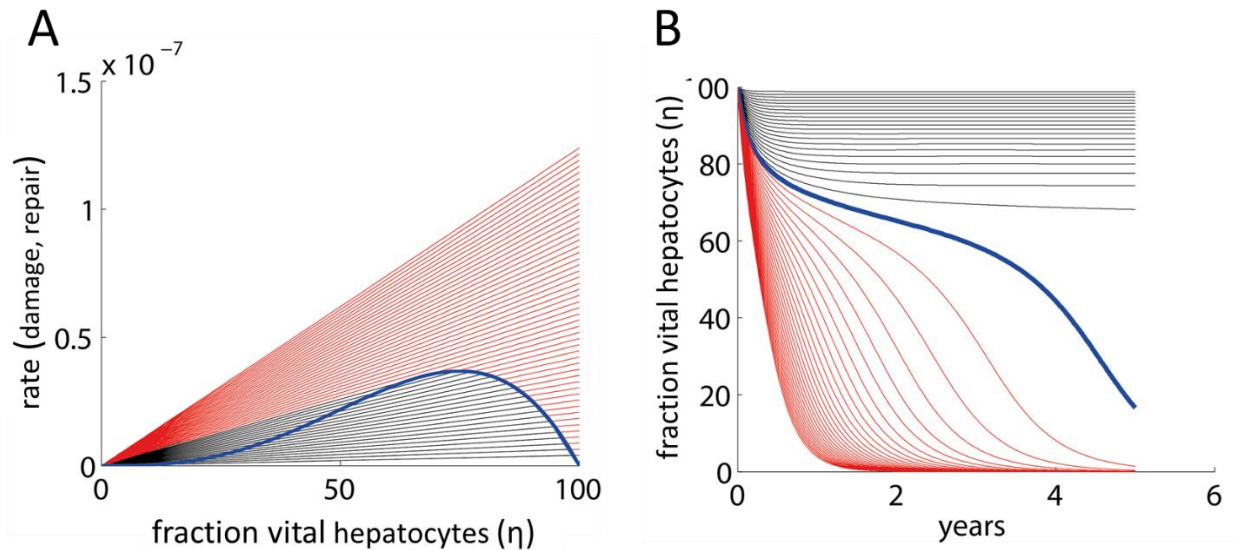

**Fig. 3** Stable and unstable fractions of functionally intact cells

A) Rate of cell regeneration (blue curve) and rates of cell damage (straight lines) in a LU as function of the fraction of intact cells. Parameter values:  $f a_{crit} = 0.1 \text{ mM}$ ;  $k_d = 3.456 \cdot 10^{-4} \text{ d}^{-1}$ ;  $k_r = 3 \cdot 10^{-2} \text{ d}^{-1}$ ;  $\beta = 30$ .

The regeneration rate  $v_r$  attains a maximum at  $\eta = 0.66$ . Straight lines refer to damage rates at varying concentrations of cellular FFAs. The ratio  $\frac{f a_{s,i}}{f a_{crit}}$  was increased from 1 to 3 in steps of 0.1. The black lines hold for ratios  $\frac{f a_{s,i}}{f a_{crit}} < 2$  where stable stationary states with non-zero fractions of intact cells exist (given by the intercept points between the black lines and the ascending part of the blue curve). For ratios  $\frac{f a_{s,i}}{f a_{crit}} > 2$ , the damage rates are persistently larger than the regeneration rate (no interception points between the red lines and the blue curve exist), i.e. the stationary state is given by a complete loss of intact cells ( $\eta = 0$ ). The blue line refers to the critical FFA level  $\frac{f a_{s,i}}{f a_{crit}} = 2$ , where the transition from a stable to an unstable state occurs.

B) Time-dependent changes of the fraction of vital cells  $\eta$  if an initially fully intact liver unit ( $\eta = 1$ ) is challenged with an elevated concentration of cellular fatty acids. As in A), the ratio  $\frac{f a_{s,i}}{f a_{crit}}$  was increased from 1 to 3 in steps of 0.1. With increasing time, the time courses tend to the stationary solutions defined by the steady-state lines in A).

### *Simulation of FFA- induced NAFLD progression*

Simulations of FFA-induced NAFLD progression of the whole liver were performed by numerical solution of the coupled equations (1) and (2) for each LU. As the progression of NAFLD takes place on the time scale of months and years, the fraction of intact hepatocytes ( $\eta$ ) was the only time-dependent variable whereas for the lipid species the steady-state solution of equation system (1) were used. Functional heterogeneity of the liver was taken into account by randomly varying the kinetic parameters of the LUs by 20% around their standard values given in Table 1. The simulations started at  $t = 0$  with a healthy liver and a physiological rate of  $v_{at}^{fa} = 2.2$  mM/min for the release of FFAs to the plasma. At time  $t = 5$  years, the release rate was increased to 3.3 mM/min. This resulted in a rise of plasma FFAs and the onset of liver steatosis, which was quantified as percentage of LUs having a TAG content larger than 30 mM. Severity of NAFLD at time  $t$  was evaluated by the total fraction of intact hepatocytes (TFH).

$$TFH_t = \frac{1}{N_u} \sum_{i=1}^{N_u} \eta_i(t) \quad (4)$$

At early time points after onset of the FFA challenge, those LUs endowed with the lowest capacities for TAG storage and/or tissue repair are unable to establish a new balance between damage and repair and thus lose their functionality, i.e.  $\eta$  tends to zero. The metabolic failure of these units entails a reduced overall FFA-esterifying capacity of the liver, causes an additional rise of the FFA plasma level and thus increases the FFA burden to other LUs. This self-amplifying cycle of organ damage may stop if a remaining fraction of LUs exists that are endowed with sufficient metabolic and repair capacities to cope with the elevated levels of FFAs.

Although the magnitude of the random variations of model parameters was identical (standard deviation = 20%), the severity of NAFLD after 30 years displayed large differences (see Fig. 4C). The reason for this is that the parameters determining blood flow rate, uptake and removal of FFA ( $k_u$ ,  $k_B$ ,  $k_{+TAG}$ ,  $k_{-TAG}$ ) and damage and repair ( $k_d$ ,  $k_r$ ) vary independently from one LU to another. Hence, the number of LUs endowed with the most favorable combination of these parameters (fast blood flow + high rate of FFA removal + low damage rate + high repair capacity) may largely differ from liver to liver.

For the example in Fig. 4A, the overall fraction of active hepatocytes dropped within five years to a moderately reduced and stable level of 80%. The clinical correlate of this type of NAFLD is a steatotic liver with low-grade inflammation. For the example in Fig. 4B, the overall fraction of active hepatocytes

dropped continuously to 45%. From the clinical viewpoint, this time course corresponds to disease progression through the stages steatosis → NASH → cirrhosis.

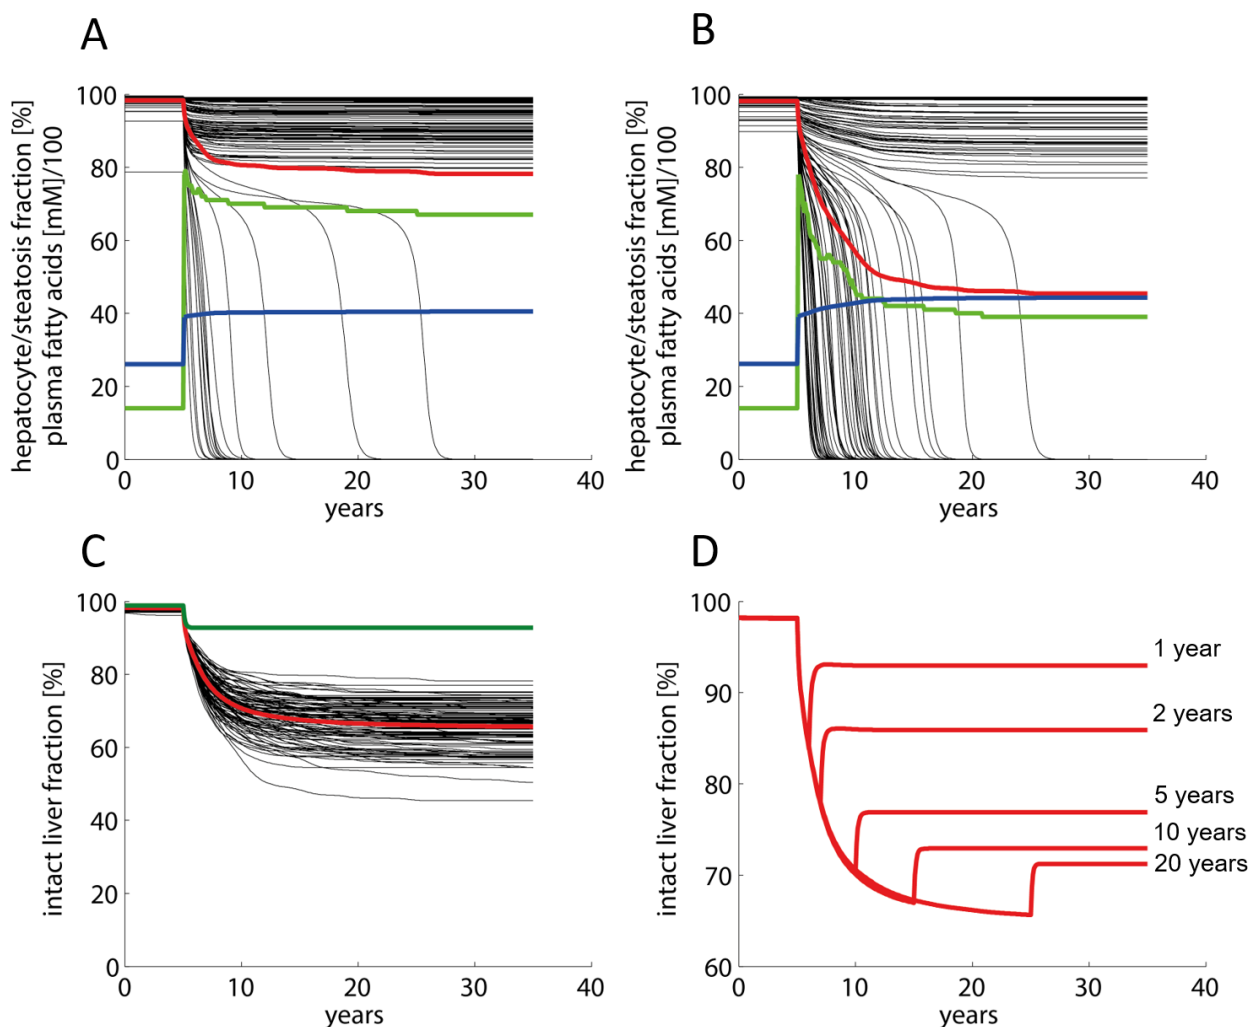

**Fig. 4** Simulated progression of FFA-induced NAFLD

Number of  $u = 100$ ; Volume of LU = 15 ml. The kinetic parameters of individual LUs varied randomly with a standard deviation of 20% around the reference values given in Table 1.

The release rate of FFA into the plasma was put to the reference value of 2.2 mM/min corresponding to a plasma FFA concentration of 0.26 mM. The simulation of the healthy liver was run until the concentration of all model variables (concentration of lipid species and fractions of active hepatocytes) had reached stationary values. At time  $t = 5$  years, the liver was confronted with a plasma FFA challenge elicited by an increase of the FFA release rate to 3.3 mM/min resulting in an initial increase of the FFA plasma concentration to 0.42 mM. Note that the further increase of the FFA plasma concentration is due to the progressive decline of the total fraction of intact hepatocytes and thus the decline of the total hepatic FFA utilizing capacity.

A, B) Examples for the variable response of the liver to an identical FFA challenge. Black curves; Fraction of intact hepatocytes in individual LUs. Red curves: Total fraction of intact hepatocytes (TFH) defined in equation (4). Blue curves: FFA plasma concentration ( $FFA_p$ ). Green curves: Liver steatosis defined as fraction of liver units having a mean TAG content larger than 30 mM.

C) Progression of NAFLD in 100 model livers.

D) Example demonstrating the residual regenerative capacity of the liver to recover when the FFA challenge is ceased at the indicated time point after onset of NAFLD

The example in Fig. 4D illustrates recovery of the liver after cessation of the FFA challenge. Without lowering the release of FFAs into the plasma, the THF declines within 30 years to about 65%. This can be prevented by interrupting the FFA challenge, i.e. setting the release rate of FFA into the plasma back to the normal value of 2.2 mM/min. A short FFA challenge of several month, as it may occur during total parenteral nutrition [33] or transient insulin resistance due to infections [34], had virtually no impact on the hepatocyte fraction. The longer the FFA challenge persisted, the lower was the fraction of hepatocytes, which could be rescued from further damage. After five years of ongoing NAFLD, interruption of the FFA challenge restored only 77% of the functional intact liver mass.

In all simulations, steatosis was generally highest immediately after onset of the FFA challenge. The decrease of hepatic TAG with progressing NAFLD reflects the increasing replacement of damaged hepatocytes by metabolically inactive fibrous tissue. The more aggressive NAFLD, the faster the decline of steatosis.

#### *Size and length scale of intra-hepatic parameter heterogeneity influences NAFLD progression*

The simulations of NAFLD progression shown in Fig. 4 were performed for livers composed of 100 LUs. With a liver volume of 1500 ml, this means a LU volume of 15 ml, which for a spherical LU corresponds to diameter of about 3 cm. This is a typical length scale, at which significant spatial differences in liver steatosis are commonly assessed by means of MRI techniques [35, 36]. In order to check how strong the statistical differences between individual NAFLD time courses depend on the size and length scale of parameter heterogeneity, we carried out simulations with livers composed of 10, 100 and 1000 LUs, corresponding to a characteristic length scale of 6.6 cm, 3 cm and 1.4 cm, respectively, and parameter variances were again put to 20%. As endpoint, we used  $TFH_{30}$ , the total fraction of intact hepatocytes after 30 years. For comparison, we carried out the simulations also for completely homogenous livers composed of LUs with identical (but from liver to liver randomly varied) parameter sets. Intriguingly, the homogeneous liver showed an ‘all-or-none’ characteristics of NAFLD progression: 90% of livers had none or only marginal signs of NAFLD but the remaining 10% ended up in complete liver failure ( $TFH_{30} = 0!$ ). In contrast, complete liver failure was not observed in the heterogenous livers. Generally, the distribution of  $TFH_{30}$  values was much broader than for the homogenous liver. With increasing number of LUs, the distribution of  $TFH_{30}$  values becomes narrower and the mean  $TFH_{30}$  values are getting smaller than the  $TFH_{30}$  of the homogeneous liver (indicated by the red bar in Fig. 5). The first finding suggests that the risk of NAFLD to progress to severe forms of disease increases with increasing length scale of functional heterogeneity. The second finding suggests that the intra-hepatic functional heterogeneity prevents

complete liver failure but entails on the average a more severe NAFLD progression as compared with a functionally homogeneous liver.

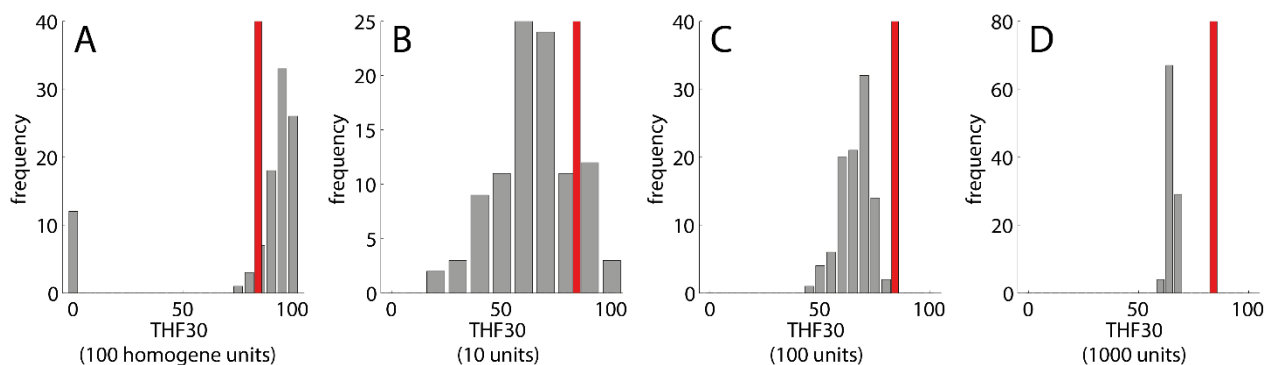

**Fig. 5** Outcome of NAFLD progression (100 livers): Frequency distribution of  $THF_{30}$  values

A) Homogenous liver composed of  $N = 100$  functionally identical LUs. B-D) Heterogeneous livers composed of various numbers (10, 100, 1000) of functionally LUs. The parameter set for each LU was randomly chosen from a normal distribution with standard deviation  $SD = 20\%$ . The red bar indicates the  $THF_{30}$  of a homogenous liver composed of functionally identical LUs.

#### *Steatosis as marker of ongoing FFA-induced tissue damage*

The heterogeneous distributions of intra-hepatic functional capacities result in different patterns of the regional TAG distribution during NAFLD progression. This raises the question whether the pattern of regional steatosis in an earlier phase of NAFLD progression may allow a prognosis of prospective disease development. We addressed this question by monitoring the TAG distribution across the individual LUs at 5, 10 and 20 years after onset of NAFLD (see Fig. 6A). Livers with a severe outcome ( $TFH_{30}$  values lower than 55%) had on the average a strikingly higher proportion of non-steatotic LUs and a higher mean TAG content of the steatotic LUs than livers with a modest NAFLD outcome ( $TFH_{30}$  values larger than 75%). This is a plausible finding as the coexistence of non-steatotic and highly steatotic regions points to a pronounced unequal intra-hepatic distribution of FFA eliminating capacities (TAG synthesis and  $\beta$ -oxidation). The above two features of TAG distribution discriminating between severe and modest outcome of NAFLD can be captured by a *steatosis pattern score* (SPS),

$$SPS = \eta(\text{TAG} < 30) \bullet \langle \text{TAG} \rangle_{\eta(\text{TAG} > 30)} \quad (5)$$

where the first factor represents the fraction of LUs with a TAG content lower than 30 mM and the second factor is the average TAG content of the complementary fraction of LUs with TAG content larger than 30 mM. Plotting  $TFH_{30}$  against the SPS (Fig. 6B-D) yielded negative correlations, which became more significant with increasing duration of the disease. For example, all livers with  $SPS < 16$  at ten years after onset of NAFLD had  $THF_{30}$  values larger than 60% whereas all livers with  $SPS > 21$  had  $THF_{30}$  values smaller

than 60%. Thus, the regional steatosis pattern at earlier time points of NAFLD progression appears to contain valuable information of the further progression of the disease. This conclusion holds without saying for conditions where the FFA challenge persists and other disease-promoting hits are absent.

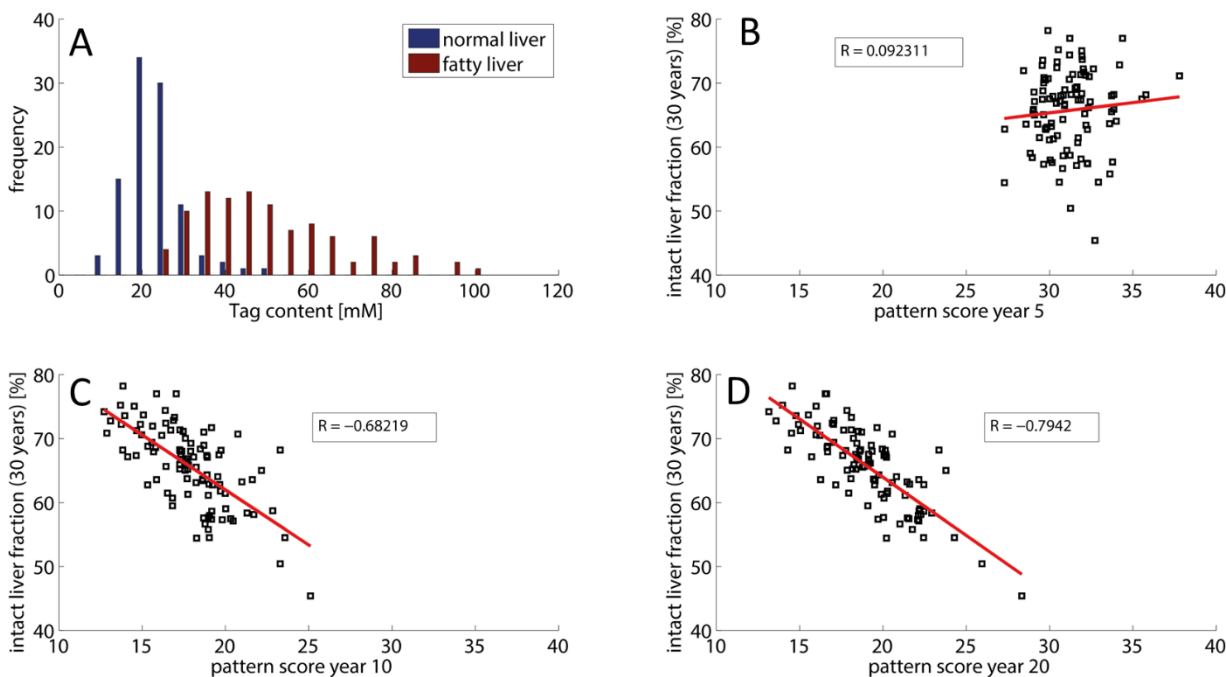

**Fig. 6** Relation between steatosis patterning and NAFLD progression

A) Average TAG distribution across the 100 LUs at five years after NAFLD onset in livers with  $THF_{30}$  values lower than 55% or higher than 75%. 100 simulations with the same parameters as in Fig. 3.

B) Relation between  $THF_{30}$  and the steatosis pattern score SPS defined by equation (5). 100 simulations with the same parameters as in Fig. 3.

### *Worsening of NAFLD progression by additional liver-damaging events*

In the preceding sections, simulated progression of NAFLD was exclusively driven by a FFA challenge without presence of further liver-damaging ‘hits’. Such hits may be caused, for example, by changes of the gut microbiome, alcohol consumption, xenobiotics, drugs or viral infections. As proposed by the ‘second hit’ hypothesis [37, 38] and more recently by the ‘multiple hit’ hypothesis [7], additional threats are necessary to drive an initially steatotic liver into NASH and even more serious stages of liver damage. As suggested by the simulations shown in the preceding sections, for a certain group of patients having an unfavorable intra-hepatic distribution of metabolic and repair capacities, such additional hits, are not required to drive the liver into severe pathological states (see example in Fig. 4B).

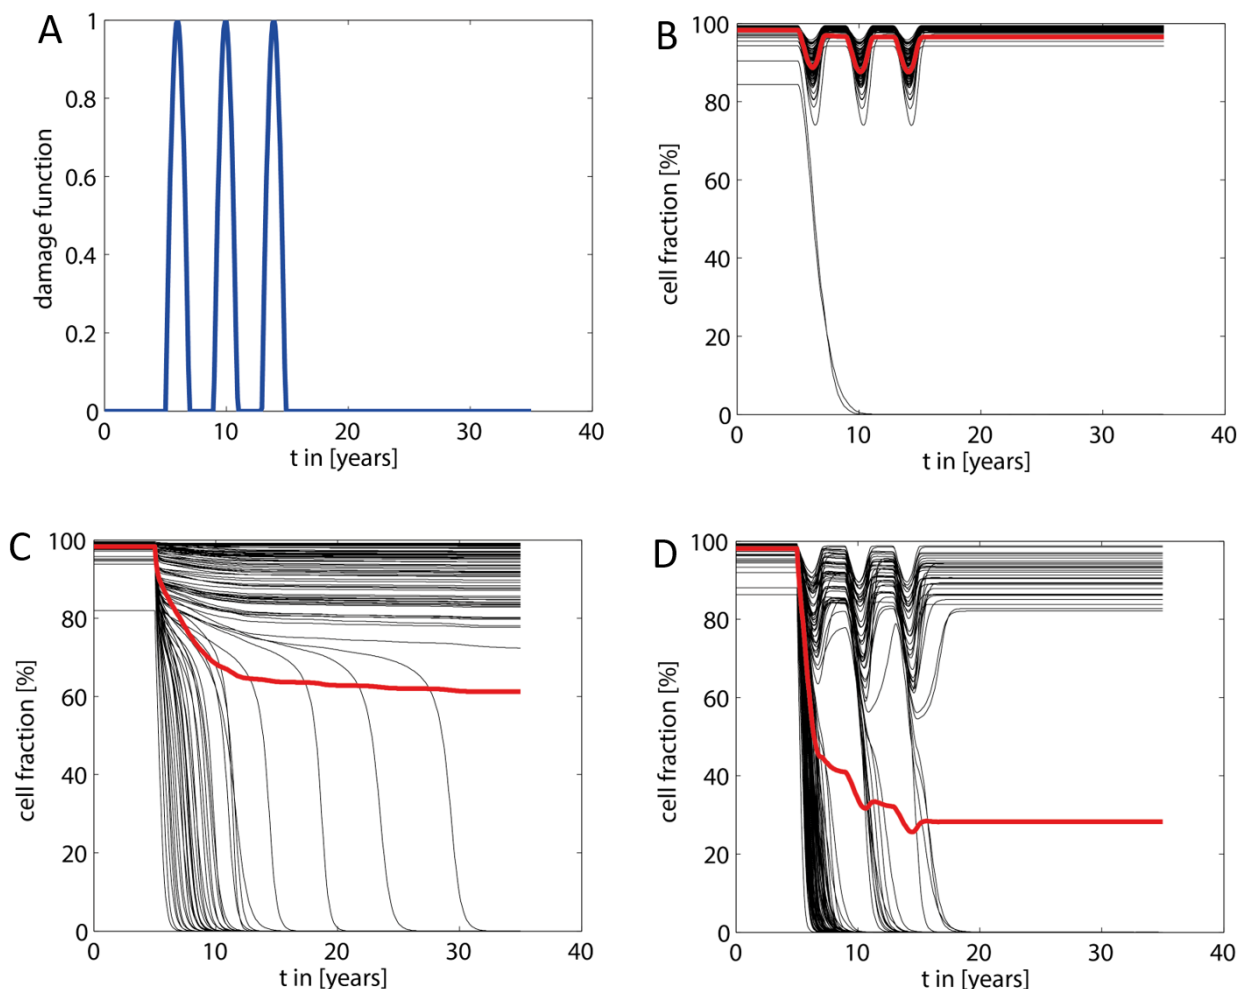

**Fig. 7** Acceleration of NAFLD progression by additional damage-causing ‘hits’

A) The additional ‘hits’ were modeled by a damage function consisting of three hits in a timely distance of three years, each hit having a duration of about a year and a maximal strength of  $2.1 \cdot 10^{-3} \text{ d}^{-1}$ , which is six times the basal damage rate  $k_d$ . At each time point,  $H(t)$  was added to the damage function  $FD(t)$  defined in equation (2).

B) Response of the liver to the transient hits shown in A).

C) Response of the liver to increased FFA load (parameters the same as in Fig. 4).

D) Response of the liver to the transient hits shown in A) in the presence of the FFA load.

Nevertheless, occurrence of additional hits may result in a dramatic acceleration of NAFLD progression. This is illustrated in Fig. 6 for a liver that was exposed to three consecutive damage-inducing hits of about a year. In the absence of the FFA challenge, the hits resulted in a reversible decrease of the total hepatocyte fraction to about 85%. The timely distance between the hits ( $\sim 3$  years in this example) was long enough to allow for a complete recovery of the liver. The FFA challenge alone resulted in a partially damaged liver with a stable  $TFH_{30}$  of about 63%. If the fatty liver was additionally exposed to the same hits

as the healthy liver, TFH dropped gradually to eventually fall below 30%. Of note, the extent of the hit-induced drop of the hepatocyte fraction became smaller with increasing number of hits, a feature that was consistently observed in these simulations. Every hit removes a fraction of LUs with less favorable damage-counteracting capacities so that, on the average, the damage resistance and repair capacity of the surviving LUs is increasing.



## Discussion

### *Intra-hepatic distribution of functional capacities influences NAFLD progression*

The most important finding of our computational study is that the heterogeneous intra-hepatic distribution of metabolic and tissue-remodeling capacities is a strong determinant of NAFLD progression. Whether the onset of fatty-acid induced cellular damage in a fraction of liver regions may trigger a cascading damage resulting in scarring, cirrhosis, and possibly liver cancer depends on the functional capacities of unaffected regions to effectively handle FFAs. Basically, an unfavorable intra-hepatic distribution of functional capacities can be sufficient to drive simple steatosis to severe forms of NAFLD without occurrence of additional hits. However, as with all diseases, numerous additional risk factors can accelerate worsening of the disease. Our simulations suggest that even in livers with mild NAFLD, the impact of such additional ‘hits’ is much more severe than in the healthy liver. Interestingly, the repeated occurrence of transient liver-damaging events represents a kind of selection pressure that favors the ‘survival’ of LUs possessing the largest capacities to withdraw and repair tissue damage (see Fig. 7D).

### *Cascading failure as a fundamental principle of disease progression*

Our study of NAFLD progression rests on the principle of cascading organ failure: Loss of function due to the failure of parts of an organ/tissue has to be compensated by other parts. This in turn overloads these parts and causing them to fail as well if adaptive mechanisms as hypertrophy and/or hyperplasy have reached their limit. In our model, the adaptive response was implicitly taken into account by the a priori statistical distribution of functional parameters across the LUs. Heart failure due to long-lasting hemodynamic overload, liver or kidney failure caused by drug intoxication or insulin resistance and inflammation of adipose tissue caused by a TAG load exceeding the expansion limit are just a few examples of organ diseases caused by cascading failure.

### *Macro-scale versus micro-scale heterogeneity*

Our mathematical model rests on the assumption that distinct spatial regions (that we named liver units – LUs) in the size range of centimeters exist, which differ from each other by blood perfusion rates, metabolic capacities of hepatocytes and the endowment with other cell types, in particular Kupffer cells and fibroblasts involved in defense and repair processes. This macro-scale heterogeneity has to be distinguished from the well-studied micro-scale heterogeneity among different zones of the acinus, commonly referred to as metabolic (functional) zonation. The existence of functional macro-scale heterogeneity of the liver can be inferred from the spatially variable distribution of blood flow rates, lipid accumulation, and clearance rates of drugs and metabolites revealed by various imaging techniques. The molecular and cellular basis of these variations remains elusive. The vasculature of the liver may play an

important role. For example, the pancreatic hormone insulin, which stimulates lipogenesis, has quite different concentrations in the various tributaries of the portal blood. Hence, hepatic territories low in insulin may explain areas spared by fat in a steatotic patient [39]. Concerning the contribution of regional differences in gene expression to intrahepatic functional heterogeneity, existing studies do not go beyond the single acinus although the technical prerequisites are now available [40]. Generally, it is well established that environmental fluctuations (extrinsic noise) affect the development of individual organisms and tissues [41]. Gene expression studies across mammalian organs suggest that random external events may largely influence the temporal trajectories of gene expression during organ development [42].

#### *Spatial patterning of steatosis: An additional risk factor?*

Our model simulations suggest an association between the pattern of steatosis and the long-term outcome of NAFLD. A strongly contrasting steatosis, i.e. coexistence of non-steatotic and highly-steatotic regions, appears to be indicative for the later occurrence of severe NAFLD stages (see Fig. 6). In the light of this finding, it could be worth to carry out a retrospective study relating clinical and histopathological data on NAFLD progression to the spatial pattern of steatosis revealed by ultrasound or nuclear magnetic resonance at the time point of diagnosis. If such study supports the model-derived hypothesis, spatially-resolved patterning of steatosis by means of non-invasive imaging techniques might be included in the list of risk factors for the transition of simple steatosis to more severe stages of NAFLD.

#### *Further extensions of the model*

The presented mathematical model of NAFLD progression is a generic one in the sense, that fundamental processes involved in the initiation and progression of the disease have been included in the model as events that trigger each other. Gradually including the huge variety of intertwined molecular and cellular processes underlying these events may seem as useful extension of the model. However, this extension should not be carried out according to the motto “put in everything that is known” but with a clear strategy that is oriented at a defined medical goal. One of the central medical goals in NAFLD research is to better understand and prevent the transition from simple steatosis to NASH. In this respect, the more detailed modeling of mechanisms and pathways involved in lipotoxic cell damage appears to be crucial in view of controversial ideas on useful pharmacological interventions. For example, abrogating the increase of hepatic lipogenesis (e.g. by inactivation of SREBP) has been advocated as a promising way to prevent steatosis and thus NASH [43]. According to our simulations (see Fig. 2) and experimental findings [44], this might be the wrong way because enhanced lipogenesis is a mechanism to lower the concentration of potentially toxic FFAs. On the other hand, excessive accumulation of TAG may induce endoplasmic

reticulum stress and cell damage [45]. This Janus-faced effect of hepatic TAG synthesis on the progression of NAFLD calls for a more detailed and physiology-based model of the cellular lipid metabolism, which in particular include the various processes involved in the synthesis, growth and degradation of LDs [46].

### **Declaration of Interests**

The authors declare that they have no competing interests.

### **Funding**

This research was funded by the German Systems Biology Programs “LiSyM”, grant no. 31L0057, sponsored by the German Federal Ministry of Education and Research (BMBF).

## References

1. DeWeerd, S., *Disease progression: Divergent paths*. Nature, 2017. **551**(7681).
2. Sondergaard, E. and M.D. Jensen, *Quantification of adipose tissue insulin sensitivity*. J Investig Med, 2016. **64**(5): p. 989-91.
3. Liu, J., et al., *Free fatty acids, not triglycerides, are associated with non-alcoholic liver injury progression in high fat diet induced obese rats*. Lipids Health Dis, 2016. **15**: p. 27.
4. Ibrahim, S.H., R. Kohli, and G.J. Gores, *Mechanisms of lipotoxicity in NAFLD and clinical implications*. J Pediatr Gastroenterol Nutr, 2011. **53**(2): p. 131-40.
5. Cordero-Espinoza, L. and M. Huch, *The balancing act of the liver: tissue regeneration versus fibrosis*. J Clin Invest, 2018. **128**(1): p. 85-96.
6. Seko, Y., K. Yamaguchi, and Y. Itoh, *The genetic backgrounds in nonalcoholic fatty liver disease*. Clin J Gastroenterol, 2018. **11**(2): p. 97-102.
7. Tilg, H. and A.R. Moschen, *Evolution of inflammation in nonalcoholic fatty liver disease: the multiple parallel hits hypothesis*. Hepatology, 2010. **52**(5): p. 1836-46.
8. Berndt, N., et al., *Functional consequences of metabolic zonation in murine livers: New insights for an old story*. Hepatology, 2020.
9. Halpern, K.B., et al., *Single-cell spatial reconstruction reveals global division of labour in the mammalian liver*. Nature, 2017. **542**(7641): p. 352-356.
10. Malarkey, D.E., et al., *New insights into functional aspects of liver morphology*. Toxicol Pathol, 2005. **33**(1): p. 27-34.
11. Berndt, N. and H.G. Holzhutter, *Dynamic Metabolic Zonation of the Hepatic Glucose Metabolism Is Accomplished by Sinusoidal Plasma Gradients of Nutrients and Hormones*. Front Physiol, 2018. **9**: p. 1786.
12. Gebhardt, R. and M. Matz-Soja, *Liver zonation: Novel aspects of its regulation and its impact on homeostasis*. World J Gastroenterol, 2014. **20**(26): p. 8491-504.
13. Kleiner, D.E. and H.R. Makhlof, *Histology of Nonalcoholic Fatty Liver Disease and Nonalcoholic Steatohepatitis in Adults and Children*. Clin Liver Dis, 2016. **20**(2): p. 293-312.
14. Sherriff, S.B., R.C. Smart, and I. Taylor, *Clinical study of liver blood flow in man measured by <sup>133</sup>Xe clearance after portal vein injection*. Gut, 1977. **18**(12): p. 1027-31.
15. Wang, X., et al., *Quantitative hepatic CT perfusion measurement: comparison of Couinaud's hepatic segments with dual-source 128-slice CT*. Eur J Radiol, 2013. **82**(2): p. 220-6.
16. Sorensen, M., et al., *Regional metabolic liver function measured in patients with cirrhosis by 2-[(1)(8)F]fluoro-2-deoxy-D-galactose PET/CT*. J Hepatol, 2013. **58**(6): p. 1119-24.
17. Bonekamp, S., et al., *Spatial distribution of MRI-Determined hepatic proton density fat fraction in adults with nonalcoholic fatty liver disease*. J Magn Reson Imaging, 2014. **39**(6): p. 1525-32.
18. Hamer, O.W., et al., *Fatty liver: imaging patterns and pitfalls*. Radiographics, 2006. **26**(6): p. 1637-53.
19. Jensen, V.S., et al., *Variation in diagnostic NAFLD/NASH read-outs in paired liver samples from rodent models*. J Pharmacol Toxicol Methods, 2019. **101**: p. 106651.
20. Berndt, N., et al., *A multiscale modelling approach to assess the impact of metabolic zonation and microperfusion on the hepatic carbohydrate metabolism*. PLoS Comput Biol, 2018. **14**(2): p. e1006005.
21. Viljanen, A.P., et al., *Effect of weight loss on liver free fatty acid uptake and hepatic insulin resistance*. J Clin Endocrinol Metab, 2009. **94**(1): p. 50-5.
22. Weisiger, R., J. Gollan, and R. Ockner, *Receptor for albumin on the liver cell surface may mediate uptake of fatty acids and other albumin-bound substances*. Science, 1981. **211**(4486): p. 1048-51.

23. Lambert, J.E., et al., *Increased de novo lipogenesis is a distinct characteristic of individuals with nonalcoholic fatty liver disease*. *Gastroenterology*, 2014. **146**(3): p. 726-35.
24. Iozzo, P., et al., *Fatty acid metabolism in the liver, measured by positron emission tomography, is increased in obese individuals*. *Gastroenterology*, 2010. **139**(3): p. 846-56, 856 e1-6.
25. Vatner, D.F., et al., *Insulin-independent regulation of hepatic triglyceride synthesis by fatty acids*. *Proc Natl Acad Sci U S A*, 2015. **112**(4): p. 1143-8.
26. Soler-Argilaga, C. and M. Heimberg, *Comparison of metabolism of free fatty acid by isolated perfused livers from male and female rats*. *J Lipid Res*, 1976. **17**(6): p. 605-15.
27. Mittendorfer, B., et al., *VLDL Triglyceride Kinetics in Lean, Overweight, and Obese Men and Women*. *J Clin Endocrinol Metab*, 2016. **101**(11): p. 4151-4160.
28. Goh, E.H. and M. Heimberg, *Effects of free fatty acids on activity of hepatic microsomal 3-hydroxy-3-methylglutaryl coenzyme A reductase and on secretion of triglyceride and cholesterol by liver*. *J Biol Chem*, 1977. **252**(9): p. 2822-6.
29. Ipsen, D.H., J. Lykkesfeldt, and P. Tveden-Nyborg, *Molecular mechanisms of hepatic lipid accumulation in non-alcoholic fatty liver disease*. *Cell Mol Life Sci*, 2018. **75**(18): p. 3313-3327.
30. Malhi, H. and G.J. Gores, *Molecular mechanisms of lipotoxicity in nonalcoholic fatty liver disease*. *Semin Liver Dis*, 2008. **28**(4): p. 360-9.
31. Mendez-Sanchez, N., et al., *New Aspects of Lipotoxicity in Nonalcoholic Steatohepatitis*. *Int J Mol Sci*, 2018. **19**(7).
32. Macdonald, R.A., *"Lifespan" of liver cells. Autoradio-graphic study using tritiated thymidine in normal, cirrhotic, and partially hepatectomized rats*. *Arch Intern Med*, 1961. **107**: p. 335-43.
33. Meyerson, C. and B.V. Naini, *Something old, something new: liver injury associated with Total parenteral nutrition therapy and immune checkpoint inhibitors*. *Hum Pathol*, 2019.
34. Yki-Jarvinen, H., et al., *Severity, duration, and mechanisms of insulin resistance during acute infections*. *J Clin Endocrinol Metab*, 1989. **69**(2): p. 317-23.
35. Bashir, M.R., et al., *Quantification of hepatic steatosis with a multistep adaptive fitting MRI approach: prospective validation against MR spectroscopy*. *AJR Am J Roentgenol*, 2015. **204**(2): p. 297-306.
36. Reeder, S.B., et al., *Quantification of hepatic steatosis with MRI: the effects of accurate fat spectral modeling*. *J Magn Reson Imaging*, 2009. **29**(6): p. 1332-9.
37. Basaranoglu, M., G. Basaranoglu, and H. Senturk, *From fatty liver to fibrosis: a tale of "second hit"*. *World J Gastroenterol*, 2013. **19**(8): p. 1158-65.
38. Mole, D.J., et al., *The isolated perfused liver response to a 'second hit' of portal endotoxin during severe acute pancreatitis*. *Pancreatology*, 2005. **5**(4-5): p. 475-85.
39. Vilgrain, V., et al., *Hepatic steatosis: a major trap in liver imaging*. *Diagn Interv Imaging*, 2013. **94**(7-8): p. 713-27.
40. Zhu, Q., et al., *Identification of spatially associated subpopulations by combining scRNAseq and sequential fluorescence in situ hybridization data*. *Nat Biotechnol*, 2018.
41. Tsimring, L.S., *Noise in biology*. *Rep Prog Phys*, 2014. **77**(2): p. 026601.
42. Cardoso-Moreira, M., et al., *Gene expression across mammalian organ development*. *Nature*, 2019. **571**(7766): p. 505-509.
43. Papazyan, R., et al., *Physiological Suppression of Lipotoxic Liver Damage by Complementary Actions of HDAC3 and SCAP/SREBP*. *Cell Metab*, 2016. **24**(6): p. 863-874.
44. Listenberger, L.L., et al., *Triglyceride accumulation protects against fatty acid-induced lipotoxicity*. *Proc Natl Acad Sci U S A*, 2003. **100**(6): p. 3077-82.
45. Han, J. and R.J. Kaufman, *The role of ER stress in lipid metabolism and lipotoxicity*. *J Lipid Res*, 2016. **57**(8): p. 1329-38.
46. Wallstab, C., et al., *A unifying mathematical model of lipid droplet metabolism reveals key molecular players in the development of hepatic steatosis*. *FEBS J*, 2017. **284**(19): p. 3245-3261.
